# Supplementary material
Source: Springer Nature journal article supplement (https://www.springermedizin.de/resource/supplementary/12936_2007_647_MOESM1_ESM.pdf/9547910)
Supplement: MOESM1 [file 9547910]

4139 Adults and children  
Screened

3693 not Eligible

446 included

208 Adults  
Wt  $\geq$  30kg  
Treated with Artequin 600/750 Lactab

Lost to  
Follow up  
= 5

Completed Treatment  
and available for  
follow-up Day 14  
n = 203  
parasitaemia cleared in all

Recrudescence or  
re-infection = 1

Parasitaemia cleared  
in 202 patients on D28

238 children  
Wt 15-29kg  
Treated with 300/375 Lactab

Lost to follow  
up = 10

Completed Treatment  
and available  
for follow-up Day 14  
n = 228  
Parasitaemia cleared in all

Recrudescence or  
re-infection = 6

Parasitaemia  
cleared in 222  
Patients: on D28
